# Supplementary material for: Analysis of Multiple Occurrences of Alternative Splicing Events in Arabidopsis thaliana Using Novel Sequenced Full-Length cDNAs
Source: PubMed Central journal article supplement — DNA Res. 2009 May 7;16(3):155–64. doi: 10.1093/dnares/dsp009 (PMC2695776; doi:10.1093/dnares/dsp009), 2009-05-07

## Supplemental Figure legends

### Figure S1.

Comparison of the numbers of AS events found in individual genes between current data set and TAIR. The current data set showed that many more genes had more than two AS events than TAIR data set.

### Figure S2.

Only one out of 14 chimeric transcripts had a continuous CDS between its first and second genes. The first gene was AT3G63340, which encoded a protein phosphatase 2C-related protein, and the second gene was AT3G63330, which encoded a protein kinase. The functional motifs found in the CDSs of the individual genes remained completely in the CDS encoded by the chimeric transcript; MAS-001H13.

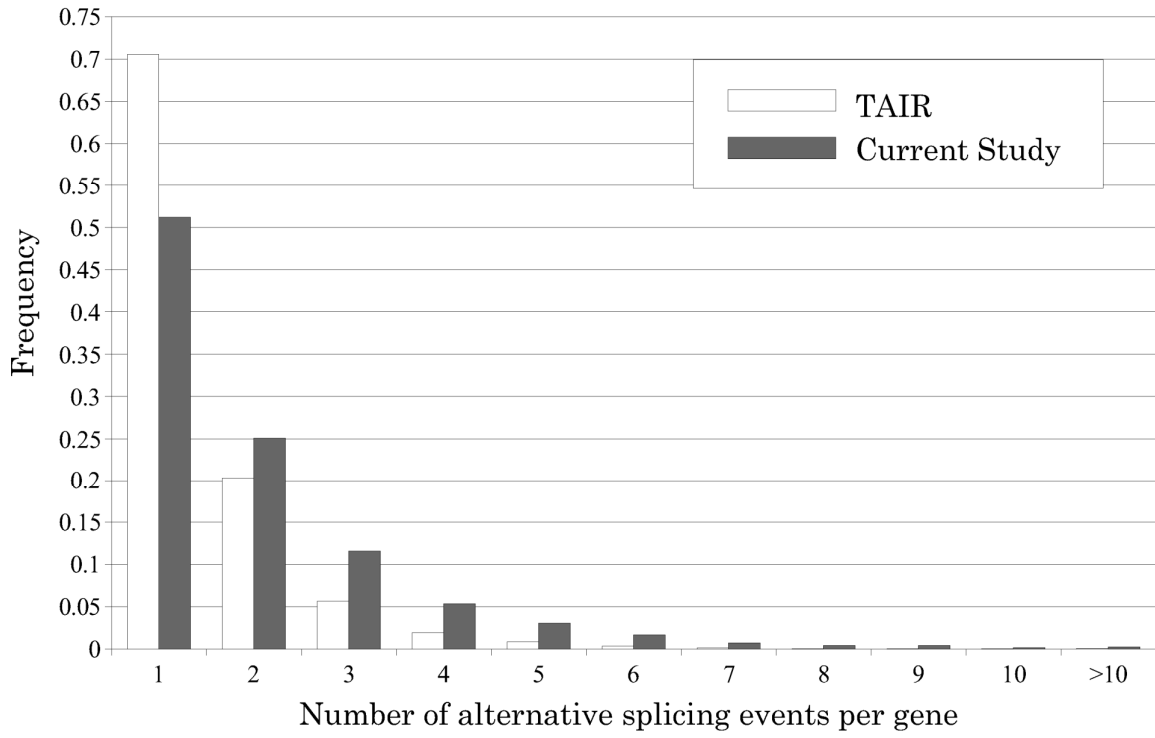

P1800\_AtTU-3-0-01560, chromosome\_3, Minus

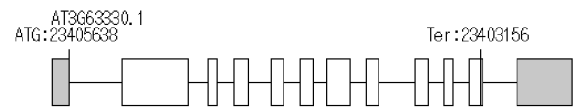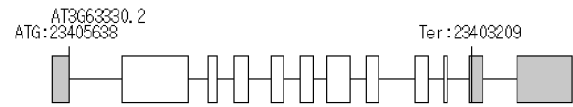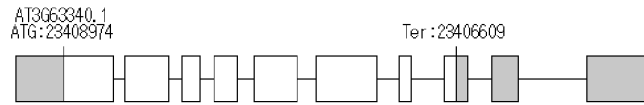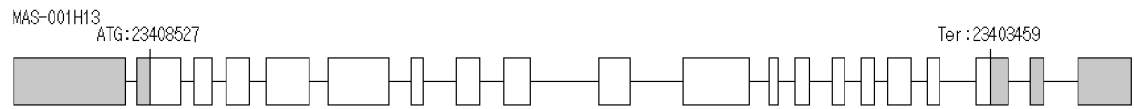

Supplement: dsp009_1.pdf [file dsp009_1.pdf]
